# Supplementary material for: Local but not long-range microstructural differences of the ventral temporal cortex in developmental prosopagnosia
Source: PubMed Central journal article supplement (PMC4640146; doi:10.1016/j.neuropsychologia.2015.10.010), 2015-11

# ILF and IFOF: Deterministic tractography (Interindividual variability in DP subjects)

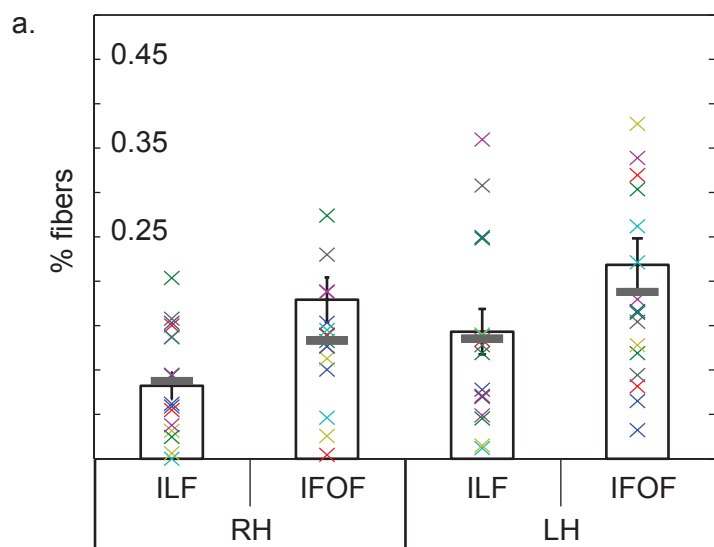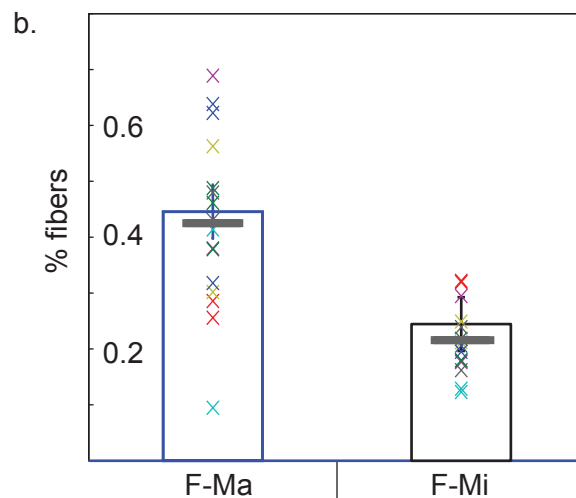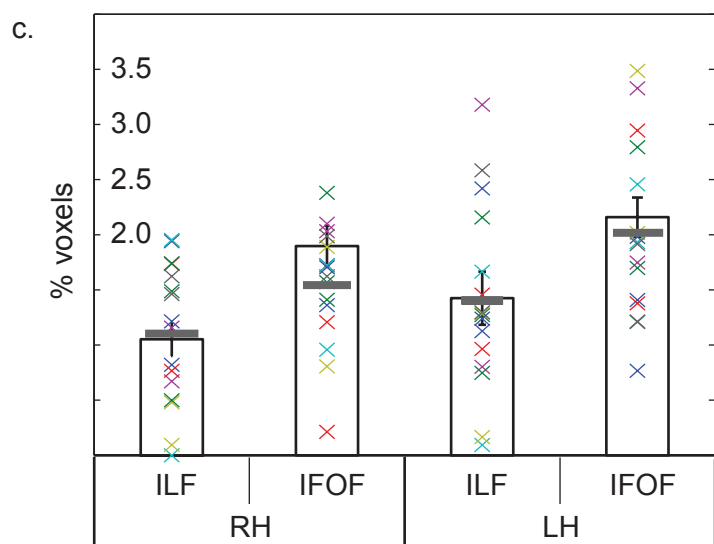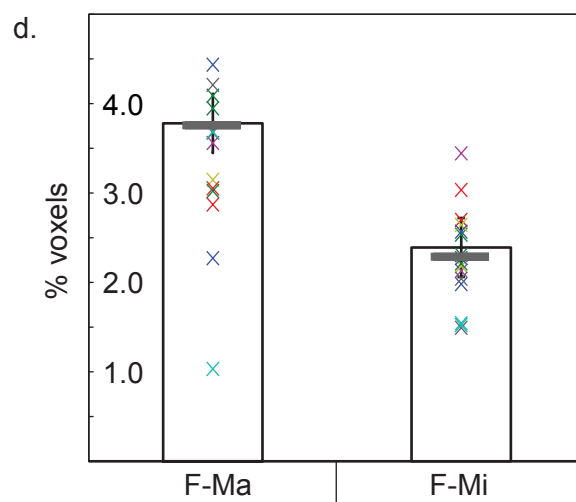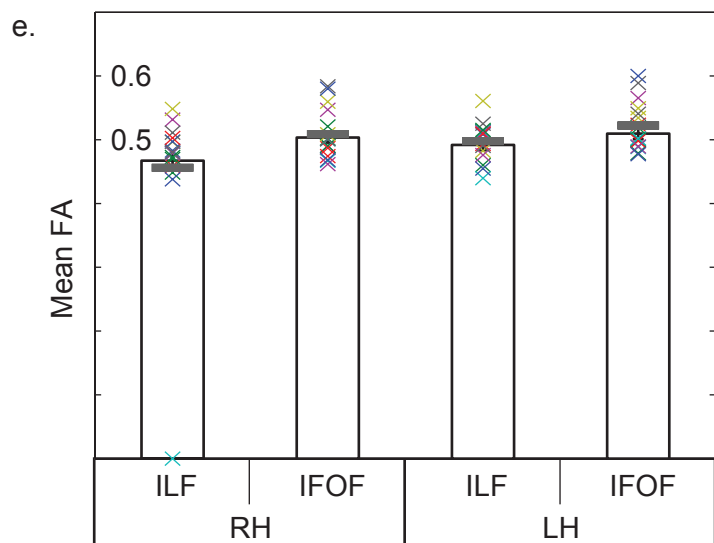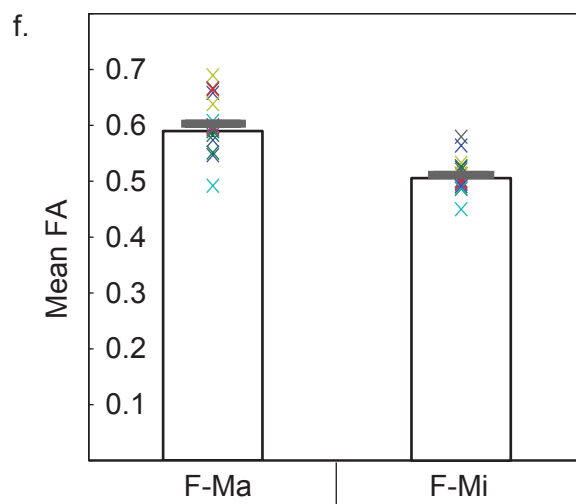

Supplement: mmc2.pdf [file mmc2.pdf]
