# Supplementary material for: Local but not long-range microstructural differences of the ventral temporal cortex in developmental prosopagnosia
Source: PubMed Central journal article supplement (PMC4640146; doi:10.1016/j.neuropsychologia.2015.10.010), 2015-11

**ILF and IFOF: Deterministic and Probabilistic tractography with group masks  
(Interindividual variability in DP subjects)**

Deterministic Tractography

Probabilistic Tractography

a. Fractional anisotropy in masked ILF and IFOF

b. Fractional anisotropy in masked ILF and IFOF

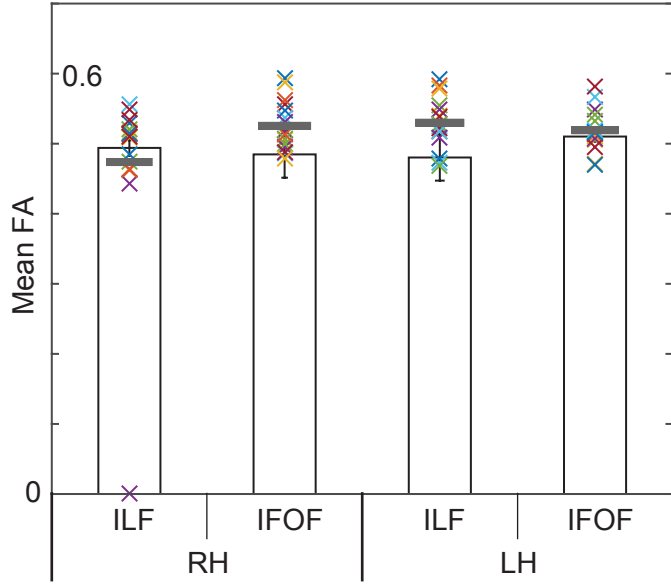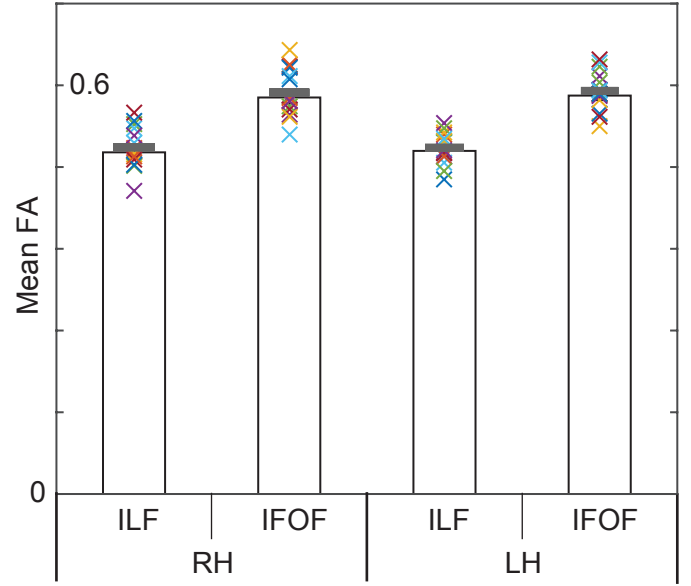

Supplement: mmc3.pdf [file mmc3.pdf]
