# Supplementary material for: Local but not long-range microstructural differences of the ventral temporal cortex in developmental prosopagnosia
Source: PubMed Central journal article supplement (PMC4640146; doi:10.1016/j.neuropsychologia.2015.10.010), 2015-11

**FFA fibers: Defined by face-specific functional regions of interest  
(Interindividual variability in DP subjects)**

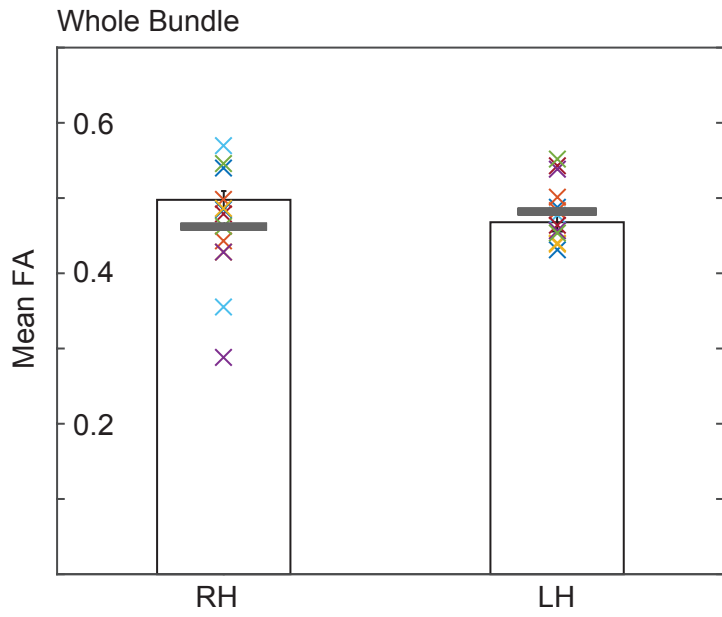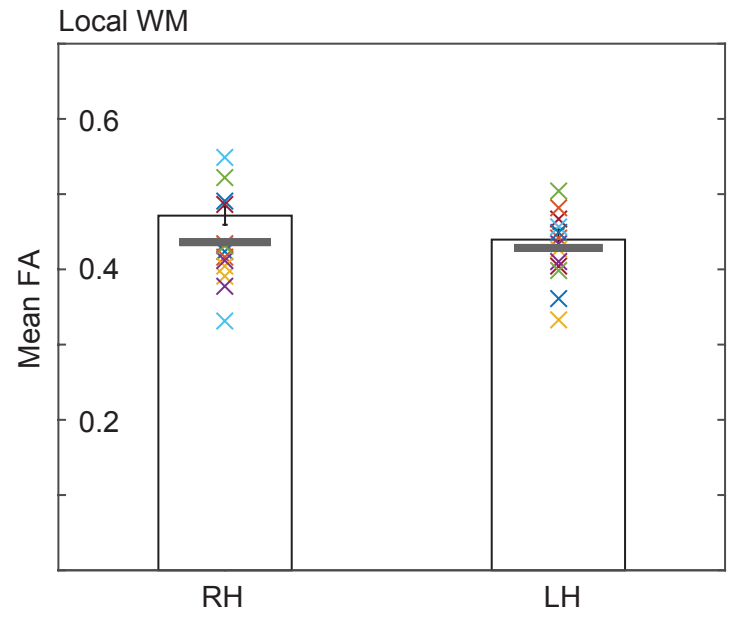

Supplement: mmc4.pdf [file mmc4.pdf]
