# Supplementary material for: Local but not long-range microstructural differences of the ventral temporal cortex in developmental prosopagnosia
Source: PubMed Central journal article supplement (PMC4640146; doi:10.1016/j.neuropsychologia.2015.10.010), 2015-11

**ILF and IFOF tracts and FFA fibers: Voxel-wise comparisons within tracts and fibers of interest (Interindividual variability in DP subjects)**

a. Fractional anisotropy in RH and LH clusters

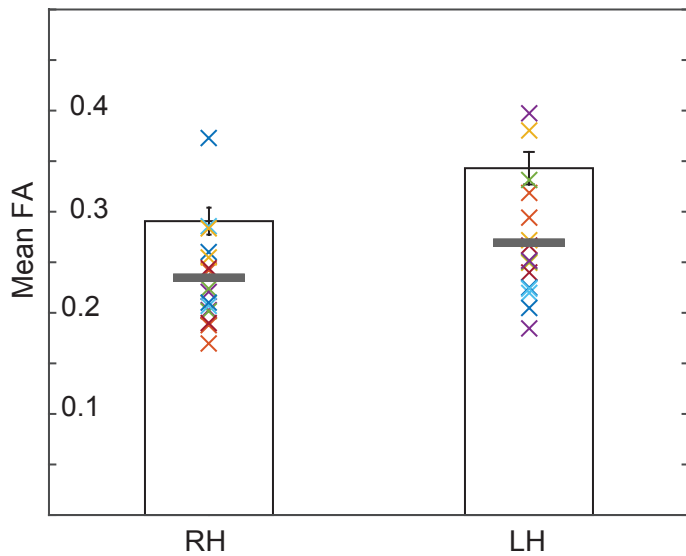

**ILF and IFOF tracts and FFA fibers: Voxel-wise comparisons within tracts and fibers of interest (other metrics at  $p < 0.005$  uncorrected and greater than 40 voxels)**

c. Mean Diffusivity (DP > controls)

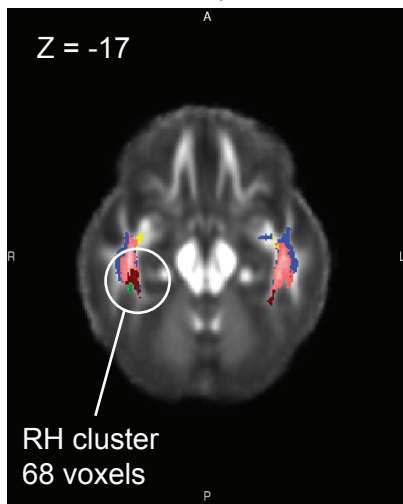

e. Axial Diffusivity (Controls > DP)

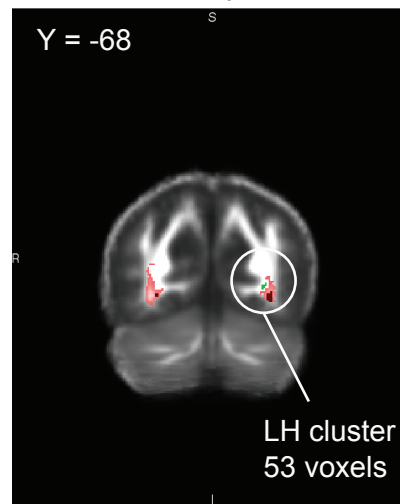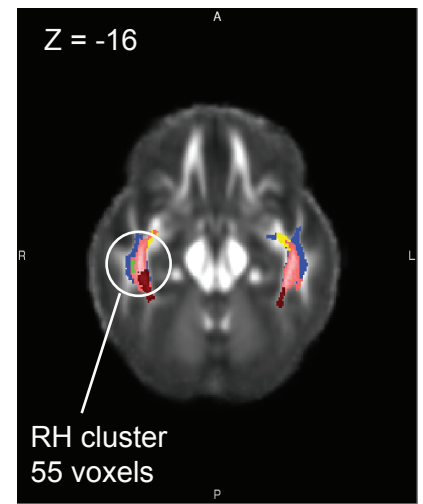

d. Radial Diffusivity (DP > controls)

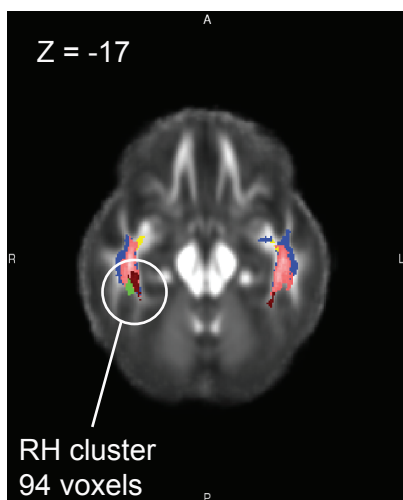

f. Fractional Anisotropy (DP > controls)

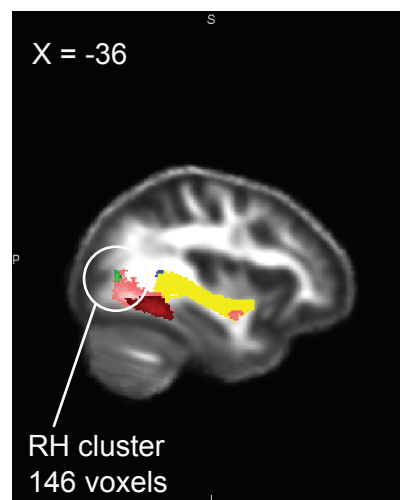

Supplement: mmc5.pdf [file mmc5.pdf]
